# Supplementary material for: Novel Antibiofilm Inhibitor Ginkgetin as an Antibacterial Synergist against Escherichia coli
Source: MDPI journal article supplement (doi:10.3390/ijms23158809), 2022-08-08
Supplement: s1 [file s1]

# Novel Antibiofilm Inhibitor Ginkgetin as an Antibacterial Synergist against *Escherichia coli*

Yubin Bai<sup>1,2,3</sup>, Weiwei Wang<sup>1,2,3</sup>, Mengyan Shi<sup>1,2,3</sup>, Xiaojuan Wei<sup>1,2,3</sup>, Xuzheng Zhou<sup>1,2,3</sup>, Bing Li<sup>1,2,3</sup>, Jiyu Zhang<sup>1,2,3\*</sup>

- 1 Key Laboratory of New Animal Drug Project of Gansu Province, Lanzhou 730050, China; 82101191226@caas.cn (Y.B.); wangweiwei@caas.cn (W.W.); 82101202383@caas.cn (M.S.); weixiaojuan@caas.cn (X.W.); zhouxuzheng@caas.cn (X.Z.); libing@caas.cn (B.L.)  
2 Key Laboratory of Veterinary Pharmaceutical Development, Ministry of Agriculture, Lanzhou 730050, China  
3 Lanzhou Institute of Husbandry and Pharmaceutical Sciences, Chinese Academy of Agricultural Sciences, Lanzhou 730050, China  
\* Correspondence: [zhangjiyu@caas.cn](mailto:zhangjiyu@caas.cn)

**Table S1.** MIC of Antibiotics Colistin B, Colistin E, and Gentamicin to different *E. coli* Species

| antibiotics | MIC(μg/mL) |        |      |      |         |      |
|-------------|------------|--------|------|------|---------|------|
|             | ATCC 25922 | C83654 | XJ24 | O149 | KD-13-1 | O101 |
| Gentamicin  | 1          | 2      | 0.5  | 16   | 1       | 32   |
| Colistin B  | 0.5        | 512    | 4    | 256  | 16      | 4    |
| Colistin E  | 0.5        | 1024   | 4    | 512  | 4       | 2    |

**Table S2.** The primer sequences used in qRT-PCR

| Genes          | sequence (5' to 3')         | Product size (bp) |
|----------------|-----------------------------|-------------------|
| <i>gapA</i> -F | CCAGGACATCGTTTCCAAC         | 103               |
| <i>gapA</i> -R | GGTGGTCATCAGACCTTCG         | 103               |
| <i>csgA</i> -F | CAGATGTTGGTCAGGGCTCAGATG    | 127               |
| <i>csgA</i> -R | CCGCCACCGAATTGTTTAACTGTC    | 127               |
| <i>csgD</i> -F | TGATGAACAACGAACGAGCGATCTC   | 146               |
| <i>csgD</i> -R | GCTTGCCAGTTACCTGATTACACATTC | 146               |
| <i>flhC</i> -F | ATGCTGCCATTCTCAACCGACTG     | 117               |
| <i>flhC</i> -R | CGCATCGACGCCATTACACAAAC     | 117               |
| <i>flhD</i> -F | CGTTAGCGGCACTGACTCTTCC      | 107               |
| <i>flhD</i> -R | TTGCGTCAACTGAGTAATCGTCTGG   | 107               |
| <i>fliC</i> -F | TTACCAACCTGAACAACACCACTACC  | 90                |
| <i>fliC</i> -R | ACATATTGGACACTTCGGTCGCATAG  | 90                |
| <i>fliM</i> -F | CCGACCAACCTGAACCTTATCCATC   | 88                |
| <i>fliM</i> -R | CCACGGCGATAAACACCAGACTC     | 88                |
| <i>luxS</i> -F | GAAAACAATGAACACCCCGCATGG    | 92                |
| <i>luxS</i> -R | TCCCTCTTTCTGGCATCACTTCTTTG  | 92                |
| <i>lsrB</i> -F | AGTGCTGACCTGGGACTCTGATAC    | 99                |
| <i>lsrB</i> -R | GCCATATCCACCAACATACCTCCTAAC | 99                |
| <i>lsrK</i> -F | GATGAACCTACCGCCTCGCTTAC     | 90                |
| <i>lsrK</i> -R | AACAATACCCACGCCAGTAGCAAG    | 90                |
| <i>lsrR</i> -F | ACCACAACAGATGCTGGCGATTG     | 143               |
| <i>lsrR</i> -R | GCTGCCCCGATTCCCCTCATATAAG   | 143               |
